# Supplementary material for: Are Pericentric Inversions Reorganizing Wedge Shell Genomes?
Source: MDPI journal article supplement (doi:10.3390/genes8120370), 2017-12-07
Supplement: s1 [file s1]

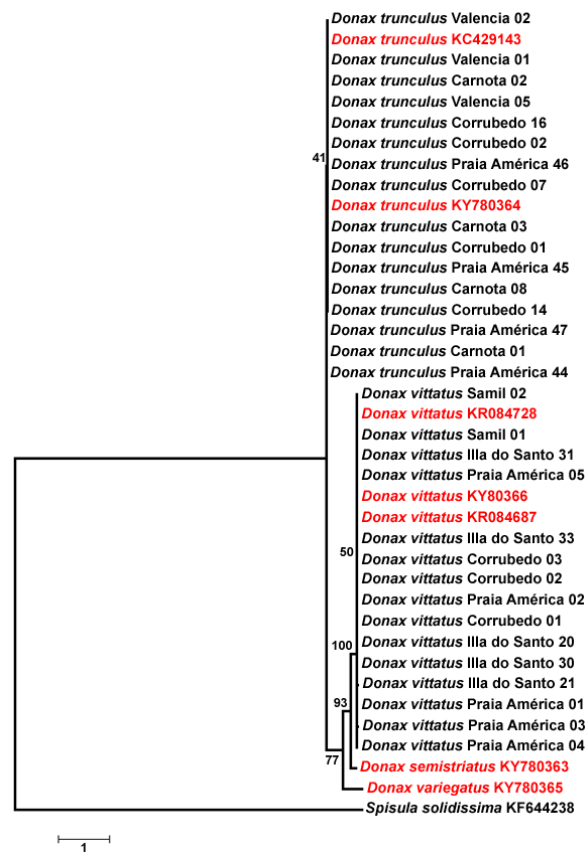

**Figure S1.** Maximum likelihood tree based on mitochondrial cytochrome oxidase I COI gene sequences of species of *Donax* using the Atlantic surf clam *Spisula solidissima* as an outgroup. Numbers in internal nodes, reported as percentages, indicate maximum-likelihood bootstrap support values (500 replicates).

*Donax trunculus* (Praia América 44)

ggtoaacaaatcaaaagatattggaagtcctttatttcgttttaggtttatgatccggcccttggtgggctggctctatagagtaataatgoggactgaqtta  
 atacatccgggcgccctttatggagagtcgtgtataatgtgtgggcacttcgcattgggttaactaatgatttcttcataagtaatacctctaataattgg  
 gtttttggtaattgggctgttcccttactgctagcagccctgatagtttttgccggctgaacaatctaagggtctgattacttccggccgcaactg  
 tccctacttatgtctaacgaagtggagagggtgtgggactgggtgaactctttaacctccgctaaggctgggtggacaccccgcccgcatg  
 gaattcatgattttagggttcaattgcaggattatcatctatttttgcagttatattttgtaactactggcgctaacatacgcacggagggttgc  
 cccccagcgtactactttgttcgtagtagtccgttggtattacgtctttcctgttggtggctgctatgctgttttagctgcaggcttaactatactgttaa  
 cagatcgaaattttaacactctctttttcgaccctgtagggggaggagatccgggtgttactcattcactattctgattttttggtaacctgaagttta

|                     |         |            |                      |        |
|---------------------|---------|------------|----------------------|--------|
| Expected patterns:  | 582/124 | 58/236/412 | 56/53/183/201/165/48 | 706 bp |
| Nantón et al. [14]: | 505/91  | 217/379    | 31/183/201/166/15    | 596 bp |

*Donax vittatus* (Praia América 01)

ggtoaacaaatcaaaagatattgtagtcctttattttgttcttggaactatgatctggcccttggtgggctggctctacagagttataatacgtactgaacta  
 atacatccctggtgccttttatggtagtctgtatataatgttttagttacgtcacatggccactataatttttttatagttataccactaataattgg  
 ttttttggtaattgagctgtgccccctctattagcggcccgcatatggttttgcggctcttaataatcttagattttggttattaccagctgctacag  
 ttcttctacttatatacaaatgaagttaggaaggagtaggaactgggtggactttatacctccctcttctgcttgattaggacacccctgccccgtata  
 gagttataattttagggcttcaattgtctggcctatcttctatttttgcagttatattttgttacacaggggctaataatgcggcctgagggagtggg  
 gctcagcgaaactacccctttttagtgtctgtagtaattacttcatttcttctcgttagctgtataccagttctagctgctggactgacgatacttctaa  
 cagatcgtaactttaataacttctttttgaccagtagggggggagagaccccgattatttttttcaactcttttgattttttggtaacctgaagttta

|                     |                   |                         |         |        |
|---------------------|-------------------|-------------------------|---------|--------|
| Expected patterns:  | 219/75/270/18/124 | 58/102/80/196/55/13/202 | 244/462 | 706 bp |
| Nantón et al. [14]: | 142/75/270/18/91  | 83/80/196/55/13/169     | 166/430 | 596 bp |

**Figure S2.** Compatibility between the expected restriction fragment patterns for *Donax trunculus* and *Donax vittatus* mitochondrial cytochrome oxidase I COI gene sequences obtained in this work and those described by Nanton et al. [14]. The sequences display both the primers used in this work (red) and those used in [14] (bold, underlined) and the restriction targets for *AluI* (yellow), *HaeIII* (green) and *MspI* (blue). The combination of restriction fragment sizes expected from our 706 bp sequences and those described in [14] (596-bp sequences) for each restriction enzyme is displayed in the corresponding colors.
